# Supplementary material for: Defatted Tenebrio molitor Larva Fermentation Extract Modifies Steatosis, Inflammation and Intestinal Microflora in Chronic Alcohol-Fed Rats
Source: PubMed Central journal article supplement (PMC7284378; doi:10.3390/nu12051426), 2020-05-14
Supplement: nutrients-12-01426-s001.pdf [file nutrients-12-01426-s001.pdf]

### **MWF altered the bacterial community composition**

The alpha diversity indices showed no significant differences among the groups. The EtOH group contained the highest number of operational taxonomic units (OTUs), whereas the lowest was observed in the Sily200 group. In terms of the Shannon index, the microbial diversity in the MWF200 group was lower than that in the Con and Sily200 groups but comparable to the EtOH group. The inverse Simpson diversity was highest in the MWF200 group and lowest in the EtOH group. Good's coverage of all treatments ranged from 99.94% to 100%, suggesting that the sequencing used effectively characterizes the microbial composition. No differences in the Good's coverage index were observed, suggesting that sequencing coverage was similar among the groups.

### **References**

1. Chao, A. Nonparametric Estimation of the Number of Classes in a Population. *Scand. J. Stat.* **1984**, *11*, 265-270.
2. Shannon, C.E. A Mathematical Theory of Communication. *Bell Syst. Tech. J.* **1948**, *27*, 379-423.

**Table S1. Composition of the control and alcohol liquid diets <sup>1</sup>**

**(g/L)**

| <b>Ingredient</b>            | <b>Control liquid diet <sup>2</sup></b> | <b>Alcohol liquid diet</b> |
|------------------------------|-----------------------------------------|----------------------------|
| Casein                       | 41.4                                    | 41.4                       |
| L-Cystine                    | 0.5                                     | 0.5                        |
| DL-Methionine                | 0.3                                     | 0.3                        |
| Corn oil                     | 8.5                                     | 8.5                        |
| Olive oil                    | 31.1                                    | 31.1                       |
| Dextrin maltose              | 115.2                                   | 25.6                       |
| Choline bitartrate           | 0.53                                    | 0.53                       |
| Cellulose                    | 10.0                                    | 10.0                       |
| Xanthan gum                  | 3.0                                     | 3.0                        |
| Vitamin Mixture <sup>3</sup> | 2.55                                    | 2.55                       |
| Mineral Mixture <sup>4</sup> | 9.0                                     | 9.0                        |
| Ethanol                      | -                                       | 50                         |

<sup>1</sup>The liquid diet was mixed in 1 L of distilled water.

<sup>2</sup>The alcohol in the alcohol liquid diet was replaced with additional dextrin maltose in the Con group.

<sup>3</sup>AIN-76 vitamin mixture.

<sup>4</sup>AIN-76 mineral mixture.

**Table S2. Effects of MWF on the body weight, food intake, serum marker levels, and lipid contents in chronic alcohol-fed rats**

|                                   | <b>Con</b>               | <b>EtOH</b>                | <b>MWF50</b>              | <b>MWF100</b>              | <b>MWF200</b>              | <b>Sily200</b>           |
|-----------------------------------|--------------------------|----------------------------|---------------------------|----------------------------|----------------------------|--------------------------|
| <b>Body weight (g)</b>            |                          |                            |                           |                            |                            |                          |
| <b>Initial</b>                    | 232.03±3.64              | 232.63±3.89                | 232.03±3.43               | 232.09±3.45                | 232.29±3.36                | 232.23±3.31              |
| <b>Final</b>                      | 485.99±5.34 <sup>c</sup> | 423.48±12.49 <sup>ab</sup> | 400.58±12.81 <sup>a</sup> | 425.74±12.98 <sup>ab</sup> | 407.38±10.82 <sup>ab</sup> | 436.89±9.23 <sup>b</sup> |
| <b>Total body weight gain (g)</b> | 253.95±5.26 <sup>c</sup> | 190.85±10.36 <sup>ab</sup> | 168.54±11.48 <sup>a</sup> | 193.64±12.14 <sup>ab</sup> | 175.08±9.11 <sup>ab</sup>  | 204.65±7.55 <sup>b</sup> |
| <b>Food intake (mL/day)</b>       | 85.18±0.12               | 84.58±1.35                 | 80.78±2.22                | 84.43±2.57                 | 78.64±1.81                 | 84.65±2.17               |
| <b>Serum marker levels</b>        |                          |                            |                           |                            |                            |                          |
| <b>Albumin (g/dL)</b>             | 4.04±0.09 <sup>a</sup>   | 4.47±0.11 <sup>b</sup>     | 4.40±0.08 <sup>b</sup>    | 4.49±0.07 <sup>b</sup>     | 4.41±0.10 <sup>b</sup>     | 4.45±0.14 <sup>b</sup>   |
| <b>Total bilirubin (mg/dL)</b>    | 0.17±0.04                | 0.23±0.04                  | 0.24±0.04                 | 0.19±0.03                  | 0.21±0.05                  | 0.17±0.02                |
| <b>Serum lipid contents</b>       |                          |                            |                           |                            |                            |                          |
| <b>Triglyceride (mg/dL)</b>       | 91.82±17.45 <sup>b</sup> | 43.30±3.40 <sup>a</sup>    | 43.62±3.20 <sup>a</sup>   | 58.25±6.19 <sup>a</sup>    | 43.20±3.18 <sup>a</sup>    | 47.24±5.49 <sup>a</sup>  |
| <b>Total cholesterol (mg/dL)</b>  | 82.70±5.75 <sup>a</sup>  | 106.70±8.91 <sup>b</sup>   | 106.05±7.42 <sup>b</sup>  | 109.95±6.25 <sup>b</sup>   | 120.10±7.20 <sup>b</sup>   | 128.90±9.64 <sup>b</sup> |
| <b>Free fatty acid (mmol/L)</b>   | 0.445±0.047              | 0.438±0.021                | 0.469±0.046               | 0.473±0.025                | 0.421±0.025                | 0.357±0.029              |
| <b>HDL-cholesterol (mg/dL)</b>    | 55.29±3.53 <sup>a</sup>  | 68.01±5.91 <sup>ab</sup>   | 63.25±6.94 <sup>ab</sup>  | 74.22±5.76 <sup>ab</sup>   | 79.76±6.19 <sup>b</sup>    | 81.18±8.13 <sup>b</sup>  |

Mean ± SE. Values not sharing a common letter (a, b, c) in the same row are significantly different among the groups.

**Table S3. Effects of MWF on the richness and diversity of the bacterial community deduced by 16S rDNA profiling in chronic alcohol-fed rats**

| <b>Items</b>   | <b>OTUs<sup>1)</sup></b> | <b>Chao1<sup>2)</sup></b> | <b>Shannon (H')<sup>3)</sup></b> | <b>Inverse Simpson<sup>4)</sup></b> | <b>Good's coverage</b> |
|----------------|--------------------------|---------------------------|----------------------------------|-------------------------------------|------------------------|
| <b>Con</b>     | 120.33±20.62             | 137.41±23.93              | 3.66±0.19                        | 0.841±0.020                         | 99.94±0.009            |
| <b>EtOH</b>    | 120.66±5.23              | 146.98±4.56               | 3.43±0.29                        | 0.817±0.020                         | 99.94±0.011            |
| <b>MWF200</b>  | 109.33±11.34             | 120.10±6.16               | 3.42±0.09                        | 0.853±0.016                         | 99.97±0.002            |
| <b>Sily200</b> | 99.66±13.54              | 112.16±19.52              | 3.51±0.24                        | 0.846±0.028                         | 100.0±0.037            |

<sup>1</sup>Operational taxonomic units.

<sup>2</sup>Chao1 richness estimator: an estimation of the total number of OTUs present in the community. A higher number indicates a higher richness [1].

<sup>3</sup>Shannon index (H'): a community diversity index that combines the number of OTUs present and their distribution [2].

<sup>4</sup>Inverse Simpson: the probability that two randomly selected individuals in the habitat will belong to the same species.
